# Supplementary material
Source: PubMed Central journal article supplement (PMC2817598)
Supplement: me.2009-0360_1.pdf [file me.2009-0360_1.pdf]

Supplemental Figure 1: Relative expression of mouse ghrelin promoter deletion constructs in  $\beta$ TC6 cells confirms de-repression pattern seen in  $\alpha$ TC1 cells. Constructs were cloned into the PGL3 luciferase reporter vector (Promega) and electroporated into  $\beta$ TC6 cells. The graph on the right shows the relative luciferase activity of each construct. Significance was determined by the unpaired student t-test (\*\*= $p < .01$ , \*\*\*= $p < .001$ ).

# Supplemental Figure 1

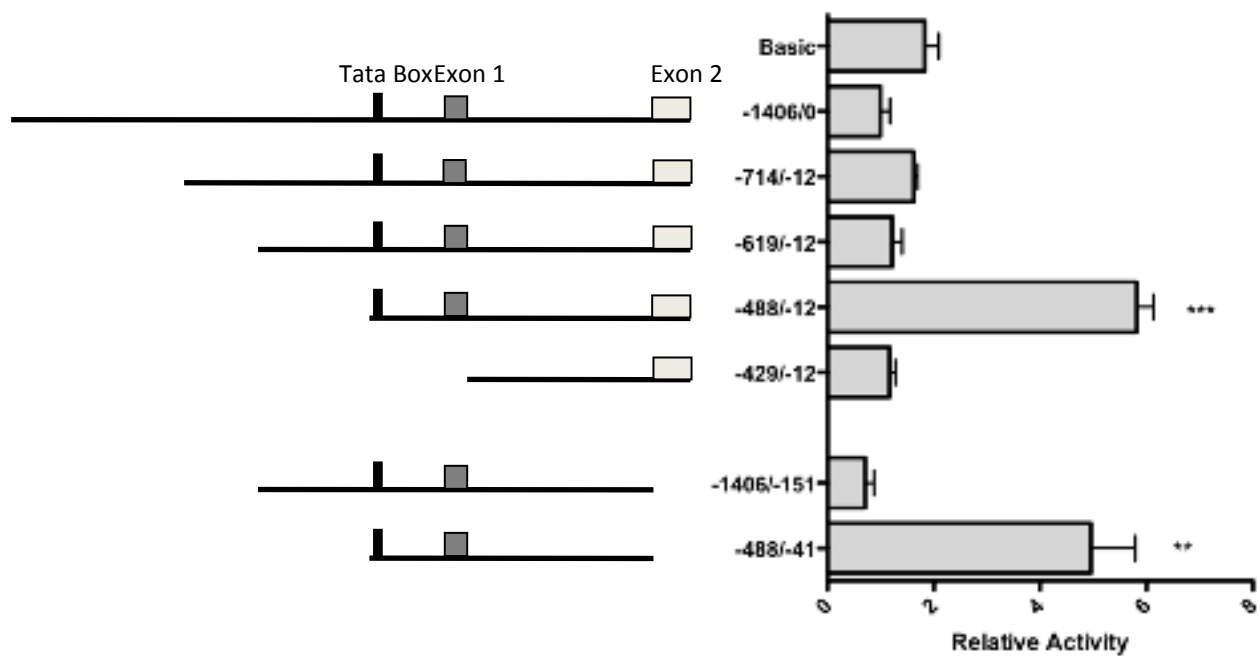

Supplemental Table 1: *In vivo* Analysis of Mouse Ghrelin Promoter

| Transgene                  | Number of lines / total screened | Number of lines germline / number of lines | Number of lines express dsRed mRNA / total lines | Line number          | e17.5*<br>RT-PCR<br>dsRed | P0*<br>RT-PCR<br>dsRed |
|----------------------------|----------------------------------|--------------------------------------------|--------------------------------------------------|----------------------|---------------------------|------------------------|
| pTimer1:[-1406/0]          | 4/37                             | 4/4                                        | 2/4                                              | 2555<br>2574         | S, I, P<br>S, I, P        | S, I, P<br>S, I, P     |
| pTimer1:<br>pGhr[-714/-12] | 4/22                             | 2/4                                        | 1/2                                              | 9433                 | S, I, P                   | S, I, P                |
| pTimer1:<br>pGhr[-488/-12] | 2/10                             | 2/2                                        | 2/2                                              | 8646<br>8650         | S, I, P<br>S, I, P        | S, I, P<br>S, I, P     |
| pTimer1:<br>pGhr[-429/-12] | 5/31                             | 3/5                                        | 0/3                                              | 8993<br>8997<br>8975 | None<br>None<br>None      | None<br>None<br>None   |
| pTimer1:<br>pGhr[-488/-41] | 3/14                             | 1/2                                        | 0/1                                              | 9520                 | None                      | None                   |

\*Detection dsRed-E5 mRNA by RT-PCR as described in materials and methods  
S = stomach, I = intestine, P = pancreas, and None = undetectable mRNA in all tissues.
